# Supplementary material for: Inhibitory effects of fermented Ougan (Citrus reticulata cv. Suavissima) juice on high-fat diet-induced obesity associated with white adipose tissue browning and gut microbiota modulation in mice
Source: Royal Society of Chemistry journal article supplement (doi:10.1039/d0fo03423a), 2021-01-01
Supplement: d0fo03423a1.pdf [file d0fo03423a1.pdf]

## 1 Supplementary materials

2 Table 1. Ingredients of maintenance purified diet

| Ingredient         | Feed ratio (g/kg) |             |
|--------------------|-------------------|-------------|
|                    | TP23522           | TP23520     |
| Casein             | 190               | 258         |
| Corn Starch        | 480               | 0           |
| Maltodextrin       | 118               | 162         |
| Sucrose            | 65                | 89          |
| Soybean Oil        | 24                | 32          |
| Lard               | 19                | 317         |
| Cellulose          | 47                | 65          |
| Mineral Mix, M1022 | 43                | 58          |
| Vitamin Mix, V1000 | 9                 | 13          |
| L-Cystine          | 3                 | 4           |
| Choline Bitartrate | 2                 | 3           |
| TBHQ               | 0.01              | 0.07        |
|                    | Total: 1000       | Total: 1000 |

|              | Feed heat ratio (%) |            |
|--------------|---------------------|------------|
|              | TP23522             | TP23520    |
| Protein      | 20                  | 20         |
| Carbohydrate | 70                  | 20         |
| Fat          | 10                  | 60         |
|              | Total: 100          | Total: 100 |
|              | Feed heat (Kcal/g)  |            |
|              | TP23522             | TP23520    |
|              | 3.9                 | 5.3        |

3

4 **Table 2. MS fragments of the flavonoids in OJ and FOJ**

| No. | Identified Compounds                   | Formula                                         | RT (min) | [M-H] <sup>-</sup> (Error, ppm) | Fragment ions in negative mode                                                                             | References                      |
|-----|----------------------------------------|-------------------------------------------------|----------|---------------------------------|------------------------------------------------------------------------------------------------------------|---------------------------------|
| 1   | Luteolin 7-O-rutinoside                | C <sub>27</sub> H <sub>30</sub> O <sub>15</sub> | 5.56     | 593.1508(0)                     | 285.0422[M-H-Rha-Glc] <sup>-</sup> ,<br>241.1035, 175.0416                                                 | Zhang, J <i>et al.</i> , 2020   |
| 2   | Eriodictyol 7-O-rutinoside             | C <sub>27</sub> H <sub>32</sub> O <sub>15</sub> | 7.38     | 595.1682(0)                     | 459.1153, 475.1806, 287.0570[M-H-Rha-Glc] <sup>-</sup>                                                     | Gattuso, G <i>et al.</i> , 2006 |
| 3   | Naringenin 7-O-rutinoside <sup>a</sup> | C <sub>27</sub> H <sub>32</sub> O <sub>14</sub> | 7.95     | 579.1716(0)                     | 271.0602[M-H-Rha-Glc] <sup>-</sup> ,<br>151.0030[M-H-Rha-Glc-C <sub>8</sub> H <sub>8</sub> O] <sup>-</sup> | Standard                        |
| 4   | Apigenin 7-O-neohesperidoside          | C <sub>27</sub> H <sub>30</sub> O <sub>14</sub> | 8.15     | 577.1568(0)                     | 457.1775, 431.1891, 269.0459[M-                                                                            | Gattuso, G <i>et al.</i> , 2006 |

|    |                                                               |                      |       |             |                                                                                                                                                                                                                                                                                           |                                                 |
|----|---------------------------------------------------------------|----------------------|-------|-------------|-------------------------------------------------------------------------------------------------------------------------------------------------------------------------------------------------------------------------------------------------------------------------------------------|-------------------------------------------------|
| 5  | Naringenin 7-O-neohesperidoside                               | $C_{27}H_{32}O_{14}$ | 8.26  | 579.1715(0) | H-Rha-Glc] <sup>-</sup><br>271.0622[M-H-Rha-Glc] <sup>-</sup> ,<br>151.0045[M-H-Rha-Glc-C <sub>8</sub> H <sub>8</sub> O] <sup>-</sup>                                                                                                                                                     | Gattuso, G <i>et al.</i> , 2006                 |
| 6  | Hesperetin 7-O-neohesperidoside                               | $C_{28}H_{34}O_{15}$ | 8.42  | 609.1836(0) | 301.0717[M-H-Rha-Glc] <sup>-</sup>                                                                                                                                                                                                                                                        | Gattuso, G <i>et al.</i> , 2006                 |
| 7  | Eriodictyol 7-O-neohesperidoside                              | $C_{27}H_{32}O_{15}$ | 8.56  | 595.1648(0) | 287.0474[M-H-Rha-Glc] <sup>-</sup> ,<br>151.0045[M-H-Rha-Glc-C <sub>8</sub> H <sub>8</sub> O] <sup>-</sup> ,<br>135.0455, 107.0153                                                                                                                                                        | Anghel, B <i>et al.</i> , 2014                  |
| 8  | Hesperetin 7-O-rutinoside <sup>a</sup>                        | $C_{28}H_{34}O_{15}$ | 8.69  | 609.1835(0) | 301.0716[M-H-Rha-Glc] <sup>-</sup>                                                                                                                                                                                                                                                        | Standard                                        |
| 9  | Apigenin 7-O-rutinoside                                       | $C_{27}H_{30}O_{14}$ | 9.77  | 577.1592(0) | 431.0962                                                                                                                                                                                                                                                                                  | Plazonić, Ana, Bucar, F <i>et al.</i> ,<br>2009 |
| 10 | Diosmetin 7-O-rutinoside or<br>Diosmetin 7-O-neohesperidoside | $C_{28}H_{32}O_{15}$ | 9.93  | 607.1668(0) | 563.1569, 341.1063, 299.0605[M-<br>H-Rha-Glc] <sup>-</sup> , 284.0614                                                                                                                                                                                                                     | Chen, Xu <i>et al.</i> , 2019                   |
| 11 | Isosakuranetin 7-O-<br>neohesperidoside                       | $C_{28}H_{34}O_{14}$ | 10.48 | 593.1867(0) | 285.0793[M-H-Rha-Glc] <sup>-</sup>                                                                                                                                                                                                                                                        | Es-Safi, N. E <i>et al.</i> , 2005              |
| 12 | Eriodictyol                                                   | $C_{15}H_{12}O_6$    | 10.61 | 287.0573(0) | 179.0585, 153.0148, 151.0035[M-<br>H-C <sub>8</sub> H <sub>8</sub> O <sub>2</sub> ] <sup>-</sup> , 135.0447[M-H-<br>C <sub>7</sub> H <sub>4</sub> O <sub>4</sub> ] <sup>-</sup> , 125.0246, 107.0094[M-<br>H-C <sub>8</sub> H <sub>8</sub> O <sub>2</sub> -CO <sub>2</sub> ] <sup>-</sup> | Es-Safi, N. E <i>et al.</i> , 2005              |
| 13 | Luteolin <sup>a</sup>                                         | $C_{15}H_{10}O_6$    | 10.71 | 285.0766(0) | 269.0066, 243.8995, 241.8980,<br>217.8679, 153.8685, 151.3631,<br>149.0009, 123.0054, 121.0265                                                                                                                                                                                            | Standard                                        |
| 14 | Isosakuranetin 7-O-rutinoside                                 | $C_{28}H_{34}O_{14}$ | 10.78 | 593.1865(0) | 285.0793[M-H-Rha-Glc] <sup>-</sup>                                                                                                                                                                                                                                                        | Es-Safi, N. E <i>et al.</i> , 2005              |
| 15 | Isosakuranetin                                                | $C_{16}H_{14}O_5$    | 10.98 | 285.0768(0) | 270.0504, 243.0662                                                                                                                                                                                                                                                                        | Zhang, J <i>et al.</i> , 2020                   |
| 16 | Apigenin <sup>a</sup>                                         | $C_{15}H_{10}O_5$    | 11.88 | 269.0316(0) | 255.0063, 225.9249, 201.8024,<br>151.0191[M-H-C <sub>8</sub> H <sub>6</sub> O] <sup>-</sup> , 119.9322                                                                                                                                                                                    | Standard                                        |

|    |                         |                                                |       |             |                                                                                                                                                                                                                                                                                                                                                                        |          |
|----|-------------------------|------------------------------------------------|-------|-------------|------------------------------------------------------------------------------------------------------------------------------------------------------------------------------------------------------------------------------------------------------------------------------------------------------------------------------------------------------------------------|----------|
| 17 | Naringenin <sup>a</sup> | C <sub>15</sub> H <sub>12</sub> O <sub>5</sub> | 12.09 | 271.0604(0) | 177.0191[M-H-C <sub>6</sub> H <sub>6</sub> O] <sup>-</sup> ,<br>151.0035[M-H-C <sub>8</sub> H <sub>8</sub> O] <sup>-</sup> ,<br>119.0510[M-H-C <sub>7</sub> H <sub>4</sub> O <sub>4</sub> ] <sup>-</sup> ,<br>107.0159[M-H-C <sub>8</sub> H <sub>8</sub> O-CO <sub>2</sub> ] <sup>-</sup> ,<br>93.0005[M-H-C <sub>9</sub> H <sub>6</sub> O <sub>4</sub> ] <sup>-</sup> | Standard |
| 18 | Diosmetin <sup>a</sup>  | C <sub>16</sub> H <sub>12</sub> O <sub>6</sub> | 12.3  | 299.0544(0) | 285.0142[M-H-CH <sub>2</sub> ] <sup>-</sup> , 242.0562,<br>151.0003[M-H-C <sub>9</sub> H <sub>8</sub> O <sub>2</sub> ]                                                                                                                                                                                                                                                 | Standard |
| 19 | Hesperetin <sup>a</sup> | C <sub>16</sub> H <sub>14</sub> O <sub>6</sub> | 12.5  | 301.0719(0) | 286.0498[M-H-CH <sub>3</sub> ] <sup>-</sup> ,<br>177.0919[M-H-C <sub>7</sub> H <sub>8</sub> O <sub>2</sub> ] <sup>-</sup> ,<br>151.0769[M-H-C <sub>9</sub> H <sub>10</sub> O <sub>2</sub> ] <sup>-</sup> ,<br>107.0027[M-H-C <sub>9</sub> H <sub>10</sub> O <sub>2</sub> -CO <sub>2</sub> ] <sup>-</sup>                                                               | Standard |

5 Rha = rhamnose moiety, Glc = glucose moiety. "N.D.": Undetected

6 <sup>a</sup> The metabolites were identified and quantified by comparing to the standard compound

7 \*p < 0.05, \*\*p < 0.01, and \*\*\*p < 0.001, compared with OJ.

8

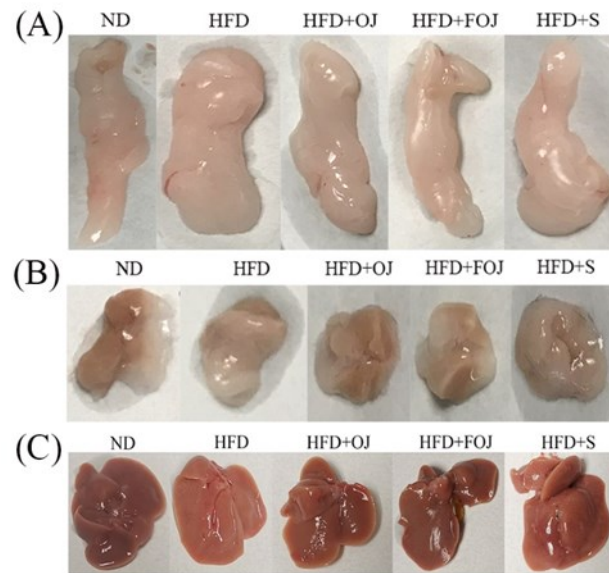

9

10 **Figure 1.** Exemplificative macroscopic images of (A) eWAT, (B) iBAT, and (C) liver from mice in the different groups.

11

## 12 **References**

13 Anghel, B., Javier, R., Carlos, A., Sepúlveda Beatriz, & Mario, S. (2014). Hplc-uv-ms profiles of phenolic compounds and antioxidant activity of fruits from  
14 three citrus species consumed in northern chile. *Molecules*, *19*(11), 17400-21.

15 Chen, X., Xu, L., Guo, S., Wang, Z., Jiang, L., & Wang, F., et al. (2019). Profiling and comparison of the metabolites of diosmetin and diosmin in rat urine,  
16 plasma and feces using uhplc-ltq-orbitrap msn. *Journal of chromatography. B, Analytical technologies in the biomedical and life sciences*, *1124*, 58.

17 Es-Safi, N. E., Kerhoas, L., Einhorn, J., & Ducrot, P. H. (2005). Application of esi/ms, cid/ms and tandem ms/ms to the fragmentation study of eriodictyol 7-o-

- 18 glucosyl-(1→2)-glucoside and luteolin 7-o-glucosyl-(1→2)-glucoside. *International Journal of Mass Spectrometry*, 247(1-3), 93-100.
- 19 Gattuso, G., Caristi, C., Gargiulli, C., Bellocco, E., Toscano, G., & Leuzzi, U. (2006). Flavonoid glycosides in bergamot juice (citrus bergamia risso). *Journal*  
20 *of Agricultural & Food Chemistry*, 54(11), 3929-35.
- 21 Plazonić, Ana, Bucar, F., Maleš, Željko, Mornar, A., Nigovic, B., & Kujundžić, Nikola. (2009). Identification and quantification of flavonoids and phenolic  
22 acids in burr parsley (*caucalis platycarpos* l.), using high-performance liquid chromatography with diode array detection and electrospray ionization mass  
23 spectrometry. *Molecules*, 14(7).
- 24 Zhang, J., Wu, X., Qiu, J., Zhang, L., & Xu, W. (2020). A comprehensive comparison on chemical profile of gcp at different ripeness stages using untargeted  
25 and pseudotargeted metabolomics. *Journal of Agricultural and Food Chemistry*, 68(31): 8483-8495.
